# Supplementary material for: Centrosomes are required for proper β-catenin processing and Wnt response
Source: PubMed Central journal article supplement — Mol Biol Cell. 2020 Aug 1;31(17):1951–61. doi: 10.1091/mbc.E20-02-0139 (PMC7525817; doi:10.1091/mbc.e20-02-0139), 2020-08-01
Supplement: mbc-31-1951-s001.pdf [file mbc-31-1951-s001.pdf]

# Supplemental Materials

*Molecular Biology of the Cell*

Vora *et al.*

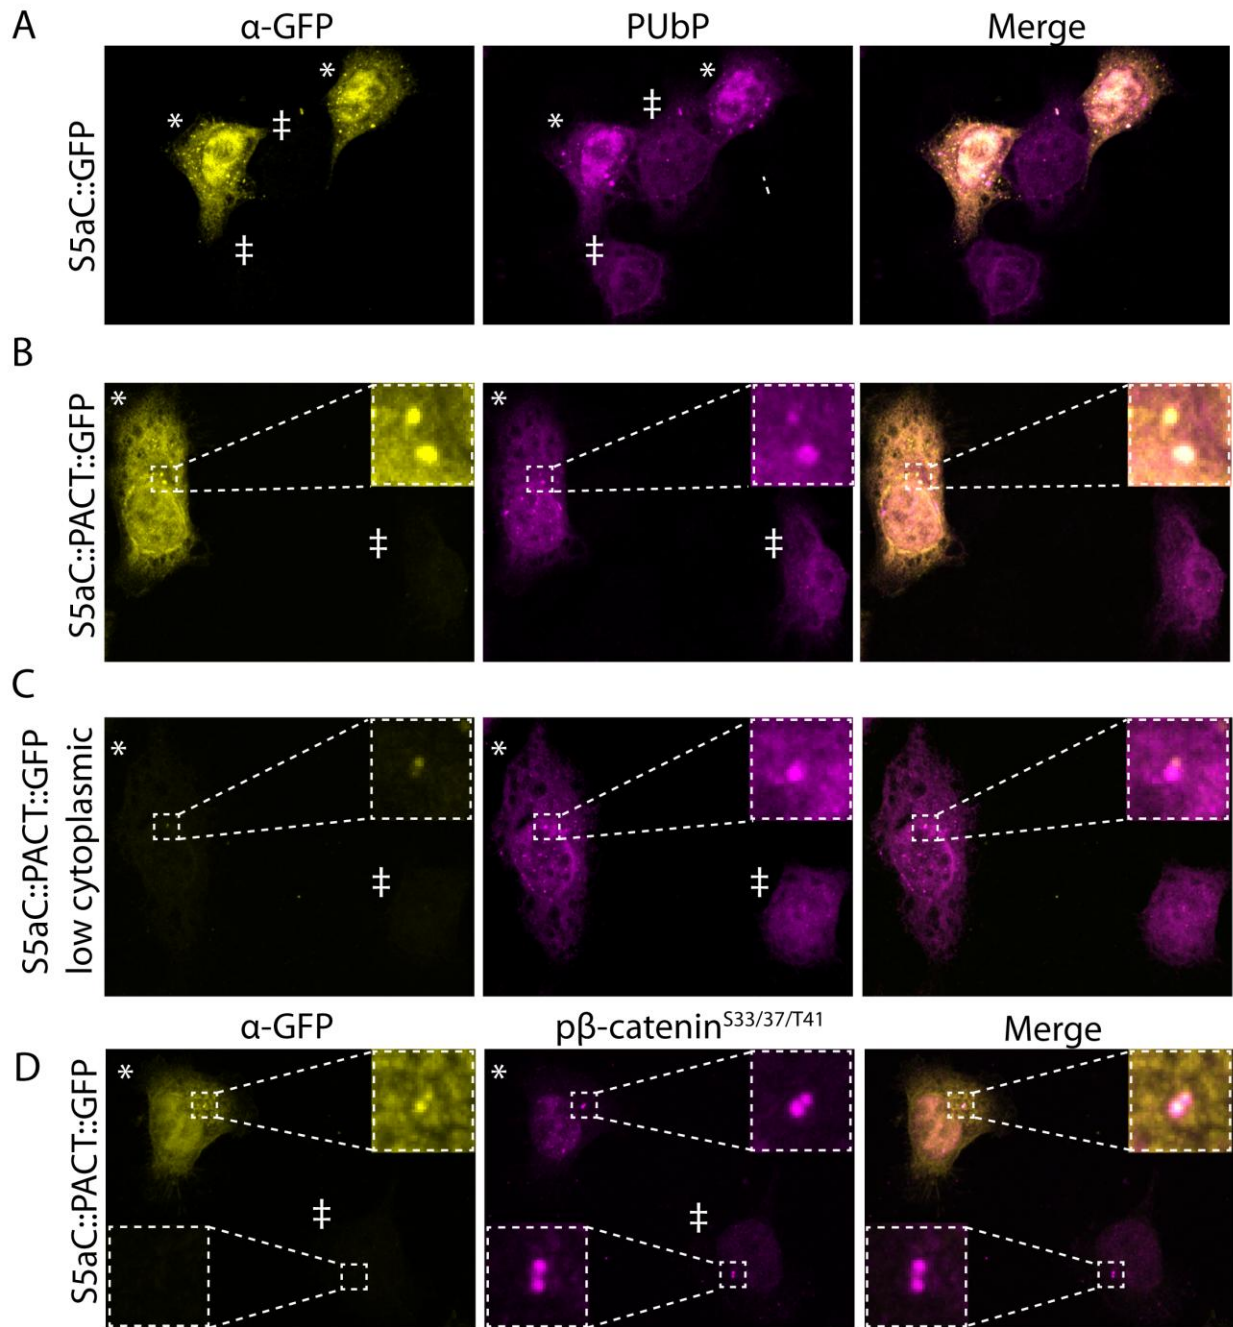

**Figure S1. pβ-catenin does not accumulate at centrosomes after inhibition of centrosome-associated degradation.** A) HeLa cells successfully transfected with the dominant negative proteasome subunit S5aC::GFP (marked with \*) show strong expression of the transgene upon immunostain with antibodies against GFP (green), and accumulation of polyubiquitinated proteins (PUbP's; magenta), while untransfected cells (marked with ‡ in the second column) show wild-type levels. B) Cell transfected with S5aC::PACT::GFP (\*) shows punctate enrichment of the fusion protein at centrosomes (4μm X 4μm dashed boxes, magnified at top right) that accumulate PUbP's (magenta, 2<sup>nd</sup> column) while the untransfected cell (‡, 2<sup>nd</sup> column)

lacks any discernable perinuclear punctae corresponding to centrosomes. C) Low-expressing S5aC::PACT::GFP cell (\*) with centrosomal localization but undetectable expression in the cytoplasm still over-accumulates centrosomal PUBP's. D) Cell transfected with S5aC::PACT::GFP (\*) similar levels of centrosomal p $\beta$ -catenin compared to untransfected cell (‡).

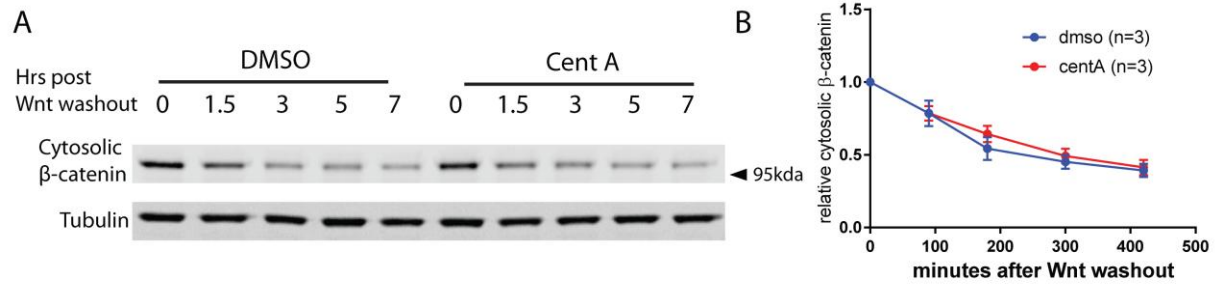

**Figure S2.  $\beta$ -catenin degradation is intact in cells without centrosomes.** A) Cells were treated with Wnt for 12 hours and allowed to recover without Wnt for indicated timespans and cytosolic extracts were blotted for  $\beta$ -catenin. B) Quantification of  $\beta$ -catenin degradation during recovery from Wnt showing identical degradation rates for cells with and without centrosomes.

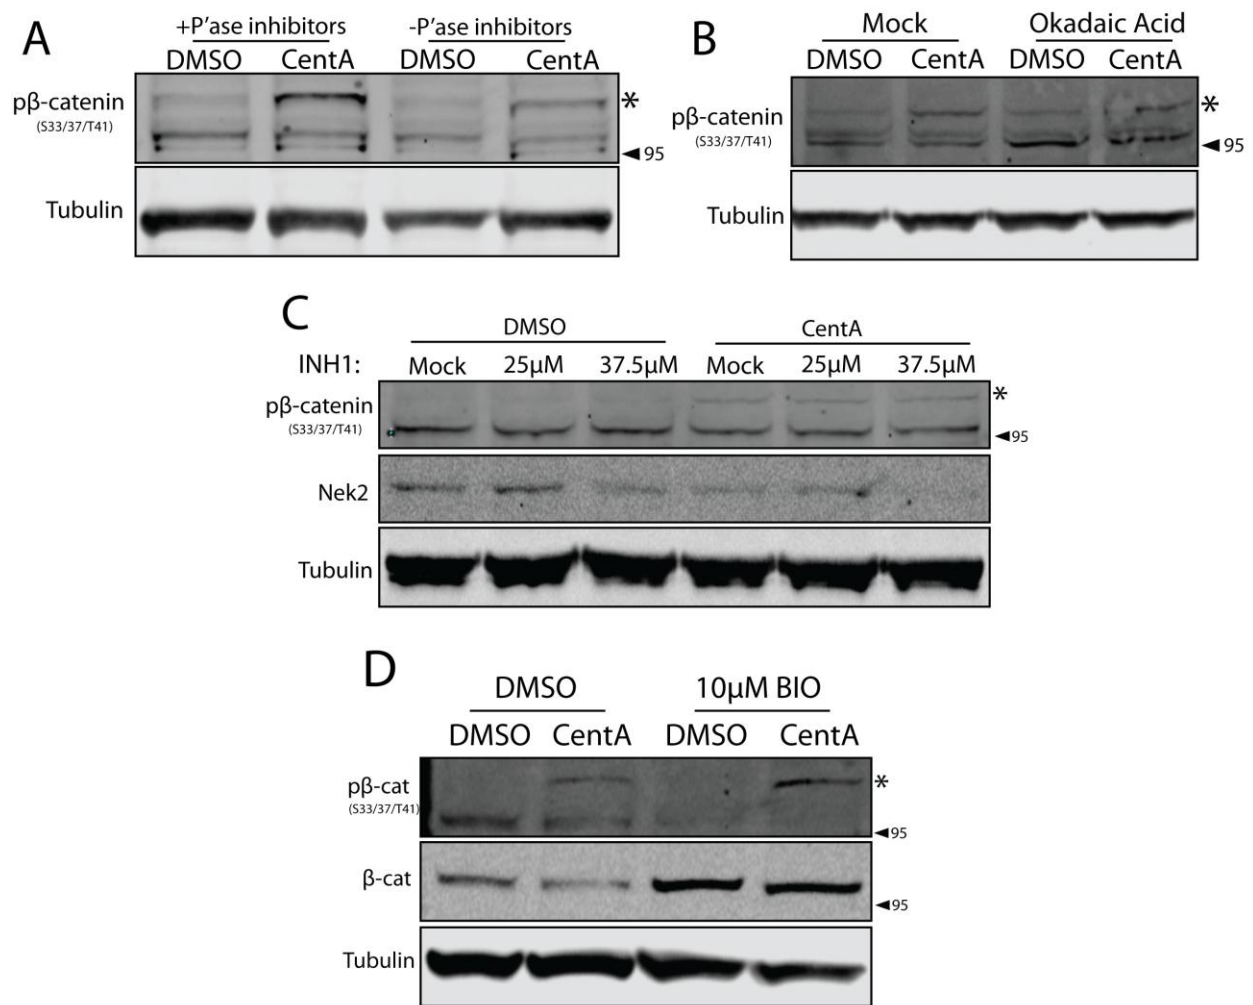

**Figure S3. Phosphorylation of CentA-dependent high molecular weight  $\beta$ -catenin is independent of GSK3 and Nek2.** A) Lysates from control and CentA cells were harvested in the presence or absence of phosphatase inhibitors showing reduction in both  $\beta$ -catenin<sup>LowMW</sup> and  $\beta$ -catenin<sup>HiMW</sup>. B) Control and CentA-treated cells were treated with Okadaic Acid or control for 4 hours and blotted for p $\beta$ -catenin showing increase in both  $\beta$ -catenin<sup>LowMW</sup> and  $\beta$ -catenin<sup>HiMW</sup>. C) Control and CentA cells treated with INH1 overnight showed severely decreased Nek2 levels yet no change in p $\beta$ -catenin<sup>LowMW</sup> or p $\beta$ -catenin<sup>HiMW</sup>. D) Treatment with BIO for 4 hours followed by blotting for p $\beta$ -catenin shows that GSK3 inhibition results in loss of p $\beta$ -catenin<sup>LowMW</sup> in both control and CentA cells, but fails to reduce p $\beta$ -catenin<sup>HiMW</sup> levels.

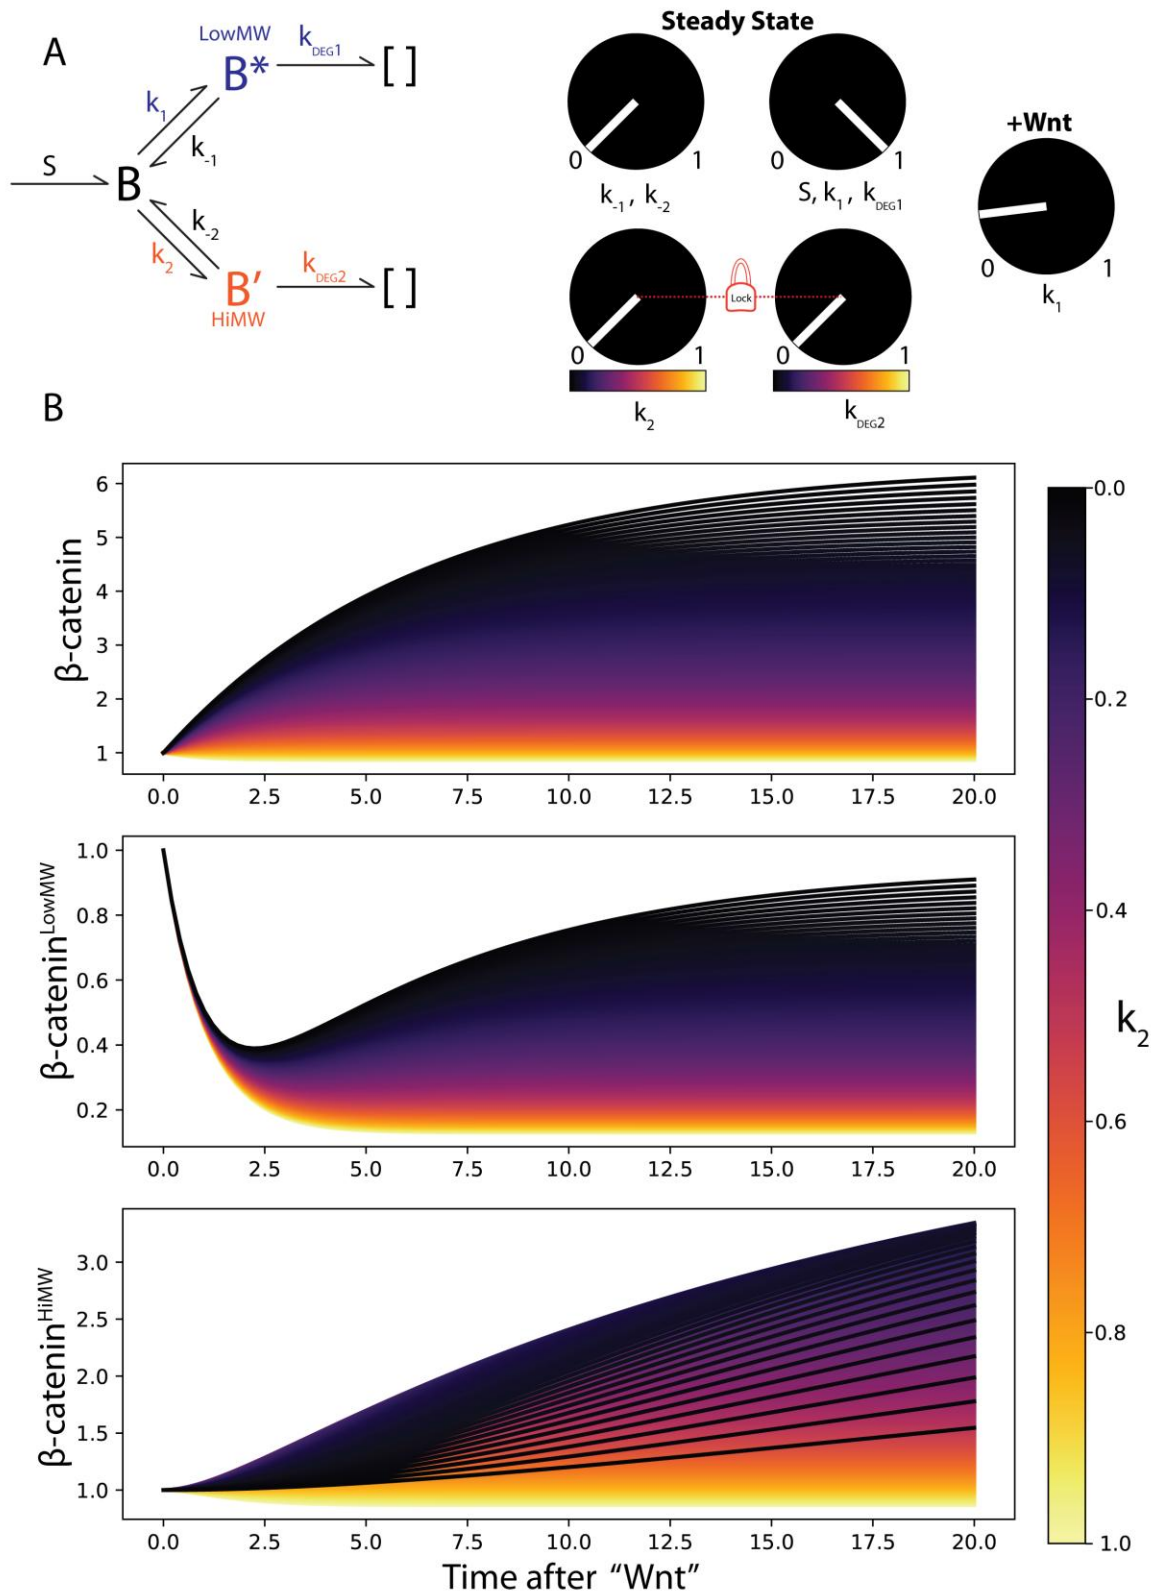

**Figure S4. A robust parameter range of Wnt-insensitive  $\beta$ -catenin degradation rates permits moderate  $\beta$ -catenin<sup>LowMW</sup> recovery while dampening  $\beta$ -catenin increase after Wnt**

**signaling.** (A) Model for  $\beta$ -catenin metabolism with Wnt-insensitive degradation steps (left panel).  $\beta$ -catenin is continually synthesized with rate  $S$  and channeled to one of two modification cascades (Wnt-sensitive [at rate  $k_1$ ] and Wnt-insensitive [at rate  $k_2$ ]) before being degraded (with rates  $k_{\text{DEG1}}$  and  $k_{\text{DEG2}}$  for  $\beta$ -catenin<sup>LowMW</sup> and  $\beta$ -catenin<sup>HiMW</sup>, respectively). On the right panel is a schematic depicting all parameter values included in the simulation. To simulate “+Wnt” conditions in  $k_1$  is reduced 5-fold, while  $K_2$  and  $K_{\text{DEG2}}$  are locked together and varied. (B) Simulations of various  $\beta$ -catenin species over a range of Wnt-insensitive degradation rates. Assuming  $\beta$ -catenin<sup>HiMW</sup> levels are at steady state under default conditions,  $k_2$  and  $k_{\text{DEG2}}$  remain fixed to one another. We then varied them from 0.01 to 1 under conditions of Wnt signaling (simulated by setting  $k_1$  to 0.15). Note that the  $\beta$ -catenin<sup>HiMW</sup> accumulation rate after Wnt increases as  $k_2$  approaches 0.2 (yellow to purple) but then decreases as  $k_2$  goes on to approach 0.01 (purple to black).

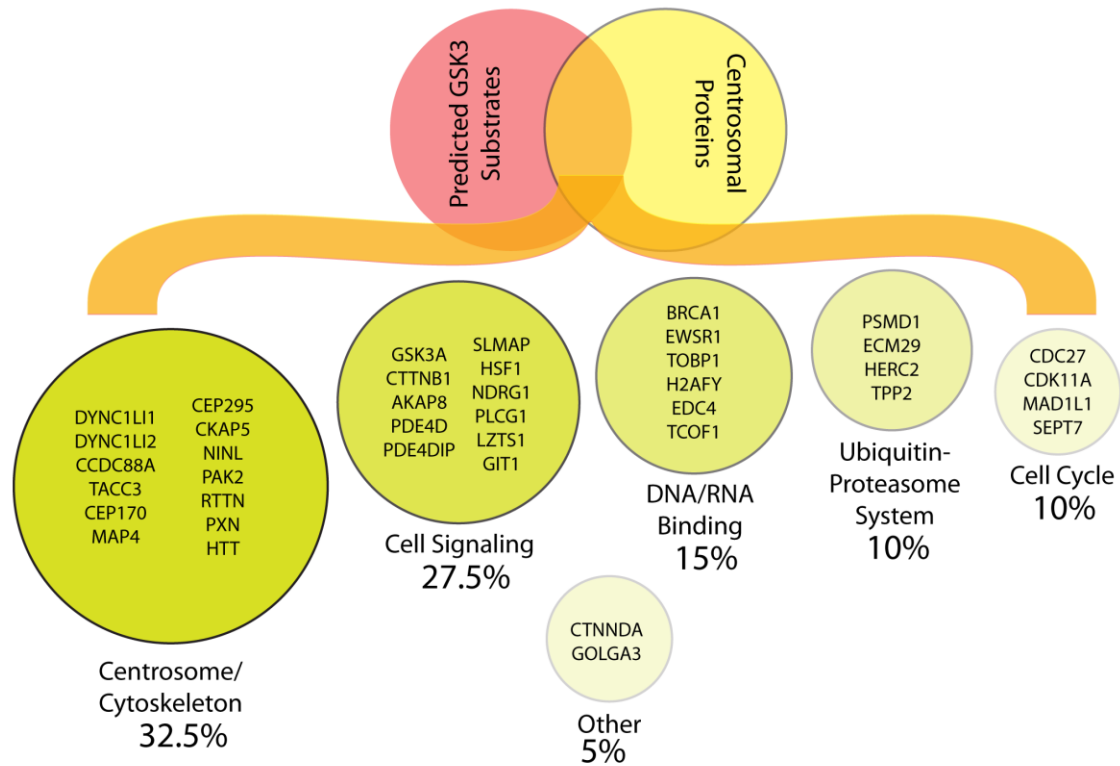

**Figure S5. Centrosomal proteins with phosphorylation sites similar to  $\beta$ -catenin.** A list of centrosomal proteins from the centrosome proteomics database was screened for sequences with tandem [S/T]XXX[S/T] motifs. Of the 191 proteins screened, a total of 40 (21%) proteins fulfilled this requirement. These 40 proteins were then organized by gene function (e.g. proteins with known function at the centrosome or in cell signaling).
